# Supplementary figures and images for: Introducing a Novel Biorelevant In Vitro Dissolution Method for the Assessment of Nicotine Release from Oral Tobacco-Derived Nicotine (OTDN) and Snus Products
Source: MDPI journal article supplement (doi:10.3390/separations9020052), 2022-02-15

# Supplemental Figure S1

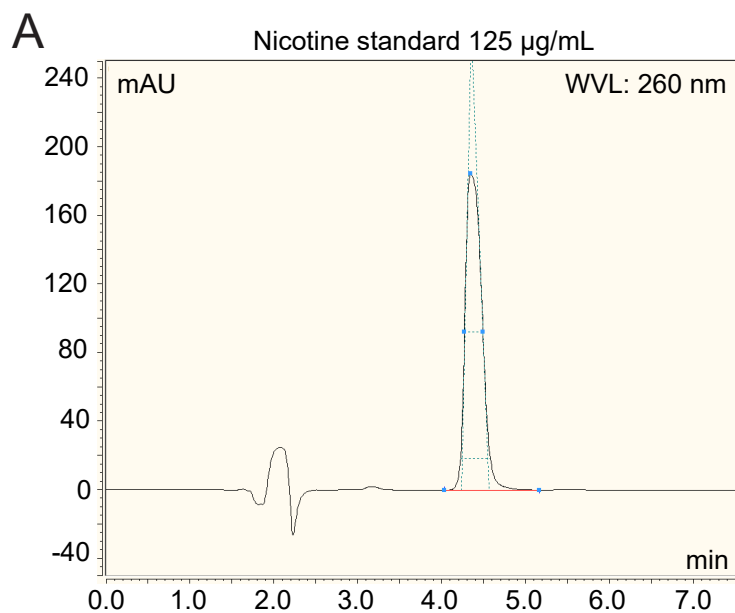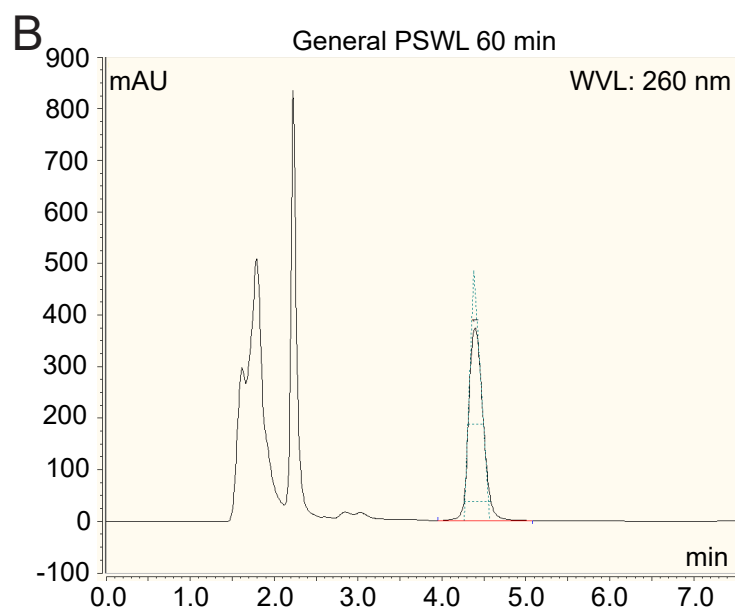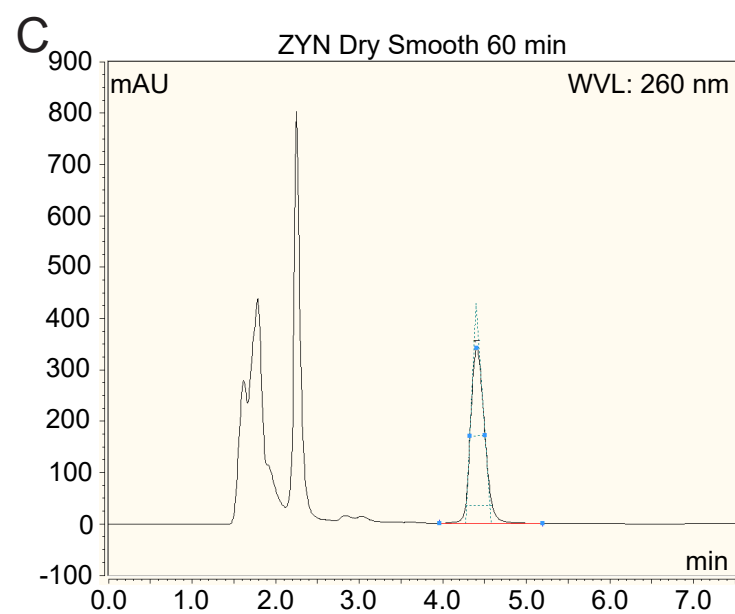

Supplement: s1 [file s1]
